# Supplementary material
Source: publisher figshare collection journal article supplement (https://tandf.figshare.com/ndownloader/files/22162623)
Supplement: Supplementary file 1 [file 22162623]

Supplemental Material

Table S1. Bivariate associations between sleep variables

|                                      | Weekdays  |              |                |                | Weekends  |              |                |                | Relative mid-sleep time on weekdays | Corrected mid-sleep time on weekends |
|--------------------------------------|-----------|--------------|----------------|----------------|-----------|--------------|----------------|----------------|-------------------------------------|--------------------------------------|
|                                      | Bedtime   | Wake-up time | Sleep duration | Mid-sleep time | Bedtime   | Wake-up time | Sleep duration | Mid-sleep time |                                     |                                      |
| Weekdays                             |           |              |                |                |           |              |                |                |                                     |                                      |
| Bedtime                              | 1.000     |              |                |                |           |              |                |                |                                     |                                      |
| Wake-up time                         | 0.348***  | 1.000        |                |                |           |              |                |                |                                     |                                      |
| Sleep duration                       | −0.788*** | 0.225***     | 1.000          |                |           |              |                |                |                                     |                                      |
| Mid-sleep time                       | 0.911***  | 0.703***     | −0.499***      | 1.000          |           |              |                |                |                                     |                                      |
| Weekends                             |           |              |                |                |           |              |                |                |                                     |                                      |
| Bedtime                              | 0.796***  | 0.329***     | −0.600***      | 0.748***       | 1.000     |              |                |                |                                     |                                      |
| Wake-up time                         | 0.328***  | 0.434***     | −0.075**       | 0.440***       | 0.446***  | 1.000        |                |                |                                     |                                      |
| Sleep duration                       | −0.369*** | 0.139***     | 0.471***       | −0.219***      | −0.429*** | 0.589***     | 1.000          |                |                                     |                                      |
| Mid-sleep time                       | 0.646***  | 0.452***     | −0.381***      | 0.688***       | 0.832***  | 0.867***     | 0.126***       | 1.000          |                                     |                                      |
|                                      |           |              |                |                |           |              |                |                |                                     |                                      |
| Relative mid-sleep time on weekdays  | −0.112*** | −0.022       | 0.098***       | −0.094***      | −0.506*** | −0.816***    | −0.359***      | −0.787***      | 1.000                               |                                      |
|                                      |           |              |                |                |           |              |                |                |                                     |                                      |
| Corrected mid-sleep time on weekends | 0.612***  | 0.518***     | −0.288***      | 0.692***       | 0.919***  | 0.648***     | −0.180***      | 0.912***       | −0.664***                           | 1.000                                |

\*\* p < 0.01, \*\*\* p < 0.001

**Table S2. Coefficients of sleep duration on weekdays, relative mid-sleep time on weekdays, and corrected mid-sleep time on weekends on the SMFQ score in multivariate linear regression in males and females**

| Independent variables                | Unstandardized coefficient<br>(95% CI) | Standardized<br>coefficient | P value      |
|--------------------------------------|----------------------------------------|-----------------------------|--------------|
| Males (n = 942) <sup>1,2</sup>       |                                        |                             |              |
| Sleep duration on weekdays           | −0.005 (−0.010, −0.000)                | −0.071                      | <b>0.041</b> |
| Relative mid-sleep time on weekdays  | −0.011 (−0.020, −0.003)                | −0.126                      | <b>0.007</b> |
| Corrected mid-sleep time on weekends | −0.001 (−0.009, 0.006)                 | −0.021                      | 0.684        |
| Females (n = 940) <sup>1,3</sup>     |                                        |                             |              |
| Sleep duration on weekdays           | −0.010 (−0.016, −0.004)                | −0.112                      | <b>0.001</b> |
| Relative mid-sleep time on weekdays  | −0.015 (−0.025, −0.006)                | −0.136                      | <b>0.002</b> |
| Corrected mid-sleep time on weekends | 0.002 (−0.007, 0.010)                  | 0.018                       | 0.687        |

<sup>1</sup>Adjusted by age and school.

<sup>2</sup>F(7, 934) = 2.73, p < 0.01, adjusted R<sup>2</sup> = 0.013

<sup>3</sup>F(7, 932) = 7.52, p < 0.001, adjusted R<sup>2</sup> = 0.046

**Table S3. Coefficients of sleep duration on weekdays, relative mid-sleep time on weekdays, and corrected mid-sleep time on weekends on the SMFQ score in multivariate linear regression for imputed data sets**

| Independent variables                      | Unstandardized coefficient<br>(95% CI) | Standardized<br>coefficient | P value        |
|--------------------------------------------|----------------------------------------|-----------------------------|----------------|
| All (n = 2309) <sup>1,2</sup>              |                                        |                             |                |
| Sleep duration on weekdays                 | −0.009 (−0.013, −0.005)                | −0.112                      | < <b>0.001</b> |
| Relative mid-sleep time on weekdays        | −0.015 (−0.021, −0.008)                | −0.149                      | < <b>0.001</b> |
| Corrected mid-sleep time on weekends       | 0.001 (−0.005, 0.006)                  | 0.009                       | 0.781          |
| Sleep duration on weekdays × sex           | −0.004 (−0.012, 0.003)                 | −0.050                      | 0.233          |
| Relative mid-sleep time on weekdays × sex  | −0.004 (−0.015, 0.008)                 | −0.019                      | 0.523          |
| Corrected mid-sleep time on weekends × sex | 0.003 (−0.007, 0.014)                  | 0.020                       | 0.546          |
| Males (n = 1187) <sup>3,4</sup>            |                                        |                             |                |
| Sleep duration on weekdays                 | −0.007 (−0.012, −0.002)                | −0.093                      | <b>0.007</b>   |
| Relative mid-sleep time on weekdays        | −0.013 (−0.021, −0.005)                | −0.143                      | <b>0.002</b>   |
| Corrected mid-sleep time on weekends       | −0.001 (−0.008, 0.006)                 | −0.009                      | 0.862          |
| Females (n = 1122) <sup>3,5</sup>          |                                        |                             |                |
| Sleep duration on weekdays                 | −0.011 (−0.017, −0.006)                | −0.128                      | < <b>0.001</b> |
| Relative mid-sleep time on weekdays        | −0.017 (−0.026, −0.007)                | −0.153                      | <b>0.001</b>   |
| Corrected mid-sleep time on weekends       | 0.002 (−0.006, 0.011)                  | 0.024                       | 0.613          |

<sup>1</sup>Adjusted by age, sex, and school.

<sup>2</sup>F(11, 2138.7) = 12.71, p < 0.001, adjusted R<sup>2</sup> = 0.058

<sup>3</sup>Adjusted by age and school.

<sup>4</sup>F(7, 1122.2) = 5.24, p < 0.001, adjusted R<sup>2</sup> = 0.027

<sup>5</sup>F(7, 1076.4) = 9.77, p < 0.001, adjusted R<sup>2</sup> = 0.056

**Table S4. Estimated relations of sleep duration on weekdays, relative mid-sleep time on weekdays, and corrected mid-sleep time on weekends with the SMFQ score using GAM in males and females**

| Smooth terms of independent variables   | Estimated degrees of freedom | Chi-square | P value      |
|-----------------------------------------|------------------------------|------------|--------------|
| Males (n = 942) <sup>1,2</sup>          |                              |            |              |
| s(Sleep duration on weekdays)           | 1.87                         | 10.24      | <b>0.010</b> |
| s(Relative mid-sleep time on weekdays)  | 1.04                         | 7.33       | <b>0.009</b> |
| s(Corrected mid-sleep time on weekends) | 1.00                         | 0.11       | 0.739        |
| Females (n = 940) <sup>1,3</sup>        |                              |            |              |
| s(Sleep duration on weekdays)           | 1.70                         | 9.97       | <b>0.018</b> |
| s(Relative mid-sleep time on weekdays)  | 1.01                         | 6.84       | <b>0.009</b> |
| s(Corrected mid-sleep time on weekends) | 1.87                         | 6.45       | <b>0.038</b> |

<sup>1</sup>Adjusted by age and school.

<sup>2</sup>Adjusted R<sup>2</sup> = 0.016

<sup>3</sup>Adjusted R<sup>2</sup> = 0.063

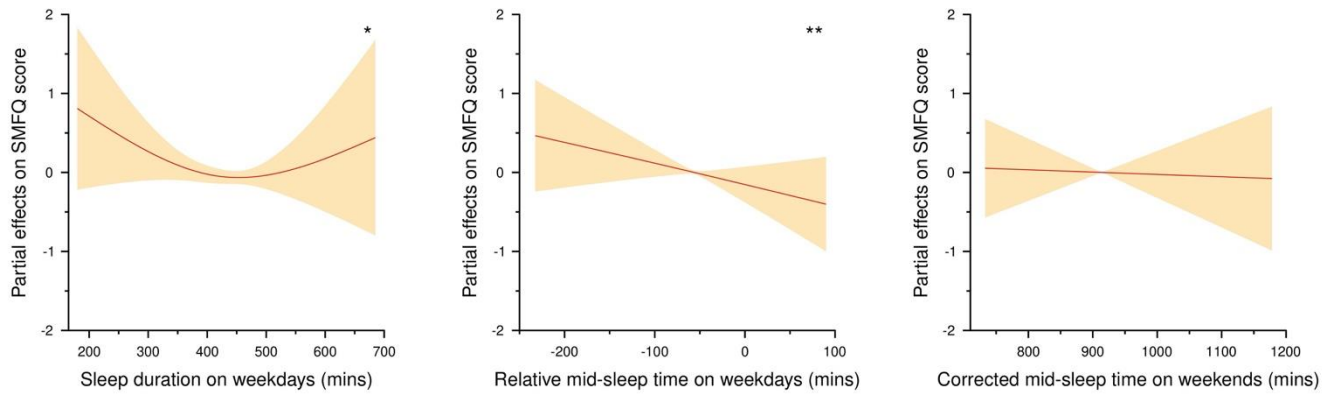

**Figure S1.** Estimated partial effects of sleep duration on weekdays, relative mid-sleep time on weekdays, and corrected mid-sleep time on weekends on the Short Mood and Feelings Questionnaire (SMFQ) score from a Generalized Additive Model (GAM) in males. The shadowed areas represent 95% confidence intervals. Natural cubic splines were applied to detect the best model shape. Age and school were used as covariates. Significant associations are marked with asterisks (\*\* $P < 0.01$ ; \* $P < 0.05$ ).

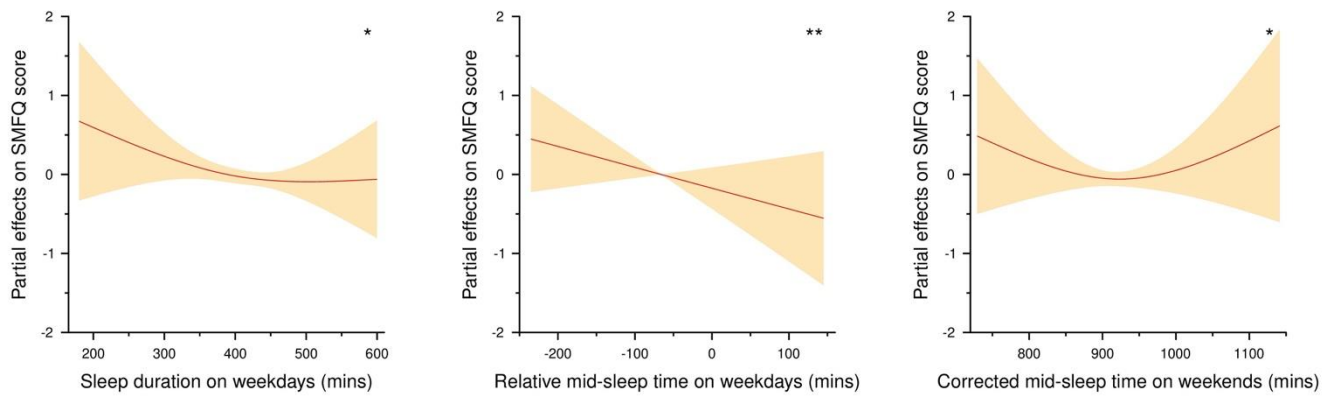

**Figure S2.** Estimated partial effects of sleep duration on weekdays, relative mid-sleep time on weekdays, and corrected mid-sleep time on weekends on the SMFQ score from a GAM in females. The shadowed areas represent 95% confidence intervals. Natural cubic splines were applied to detect the best model shape. Age and school were used as covariates. Significant associations are marked with asterisks (\*\* $P < 0.01$ ; \* $P < 0.05$ ).
